# Supplementary material for: Genome-Wide Association Study of Cadmium Accumulation at the Seedling Stage in Rapeseed (Brassica napus L.)
Source: Front Plant Sci. 2018 Apr 19;9:375. doi: 10.3389/fpls.2018.00375 (PMC5917214; doi:10.3389/fpls.2018.00375)
Supplement: Supplementary file 3 [file Table_3.XLSX]

## Sheet: Sheet1
Supplementary Table S3. Summary of plausible candidate genes associated with Cd accumulation.
Trait	SNPa		Chr	Loc	Candidate genes	Chr	distance (Kb)b	Site_strat（bp）	Orthologous genesc	Function annotation d
SCC	Bn-A05-p4569670		A05	4422400	BnaA05g08290	A05	354.214	4068186	AT5G15690	zinc ion binding		zinc ion binding; FUNCTIONS IN: zinc ion binding; INVOLVED IN: response to cadmium ion; EXPRESSED IN: cultured cell; CONTAINS InterPro DOMAIN/s: Zinc finger, GRF-type (InterPro:IPR010666); BEST Arabidopsis thaliana protein match is: zinc ion binding (TAIR:AT4G04775.1); Has 107 Blast hits to 107 proteins in 8 species: Archae - 0; Bacteria - 2; Metazoa - 0; Fungi - 0; Plants - 98; Viruses - 7; Othe…	protein_coding
SCC	Bn-A09-p23928124		A09	22308543	BnaA09g29540	A09	181.444	22127099	AT1G27130	glutathione S-transferase tau 13	Encodes glutathione transferase belonging to the tau class of GSTs. Naming convention according to Wagner et al. (2002).	glutathione S-transferase tau 13 (GSTU13); FUNCTIONS IN: glutathione transferase activity; INVOLVED IN: response to cadmium ion, toxin catabolic process; LOCATED IN: cytoplasm; EXPRESSED IN: 23 plant structures; EXPRESSED DURING: 13 growth stages; CONTAINS InterPro DOMAIN/s: Thioredoxin fold (InterPro:IPR012335), Glutathione S-transferase, C-terminal (InterPro:IPR004046), Glutathione S-transferas…	protein_coding
SCC	Bn-A09-p23928124		A09	22308543	BnaA09g29890	A09	3.062	22311605	AT3G48000	aldehyde dehydrogenase 2B4	Encodes a putative (NAD+) aldehyde dehydrogenase.	aldehyde dehydrogenase 2B4 (ALDH2B4); FUNCTIONS IN: 3-chloroallyl aldehyde dehydrogenase activity, aldehyde dehydrogenase (NAD) activity, ATP binding; INVOLVED IN: response to cadmium ion; LOCATED IN: mitochondrion, chloroplast; EXPRESSED IN: 24 plant structures; EXPRESSED DURING: 14 growth stages; CONTAINS InterPro DOMAIN/s: Aldehyde/histidinol dehydrogenase (InterPro:IPR016161), Aldehyde dehydr…	protein_coding
SCC	Bn-scaff_18322_1-p2327100		C03	6887429	BnaC03g13300	C03	443.169	6444260	AT3G13110	serine acetyltransferase 2;2	Encodes a mitochondrial serine O-acetyltransferase involved in sulfur assimilation and cysteine biosynthesis. Expressed in the vascular system.	serine acetyltransferase 2;2 (SERAT2;2); FUNCTIONS IN: zinc ion binding, serine O-acetyltransferase activity; INVOLVED IN: response to cadmium ion, cysteine biosynthetic process; LOCATED IN: mitochondrion; EXPRESSED IN: 26 plant structures; EXPRESSED DURING: 15 growth stages; CONTAINS InterPro DOMAIN/s: Hexapeptide transferase, conserved site (InterPro:IPR018357), Serine O-acetyltransferase (Inte…	protein_coding
SCC	Bn-scaff_18322_1-p2327100		C03	6887429	BnaC03g13410	C03	402.437	6484992	AT5G56550	oxidative stress 3	Encodes OXIDATIVE STRESS 3 (OXS3)&#65292; involved in tolerance to heavy metals and oxidative stress.	OXIDATIVE STRESS 3 (OXS3); BEST Arabidopsis thaliana protein match is: unknown protein (TAIR:AT4G26288.1); Has 1807 Blast hits to 1807 proteins in 277 species: Archae - 0; Bacteria - 0; Metazoa - 736; Fungi - 347; Plants - 385; Viruses - 0; Other Eukaryotes - 339 (source: NCBI BLink).	protein_coding
SCC	Bn-scaff_18322_1-p2327100		C03	6887429	BnaC03g15020	C03	480.559	7367988	AT5G53460	NADH-dependent glutamate synthase 1	NADH-dependent glutamate synthase	NADH-dependent glutamate synthase 1 (GLT1); FUNCTIONS IN: glutamate synthase (NADH) activity; INVOLVED IN: nitrate assimilation, response to cadmium ion, glutamate biosynthetic process; LOCATED IN: chloroplast stroma, chloroplast, plastid; EXPRESSED IN: 24 plant structures; EXPRESSED DURING: 13 growth stages; CONTAINS InterPro DOMAIN/s: FAD-dependent pyridine nucleotide-disulphide oxidoreductase …	protein_coding
RCC	Bn-A06-p2940743		A06	2840366	BnaA06g04090	A06	348.48	2491886	AT3G17240	lipoamide dehydrogenase 2	lipoamide dehydrogenase precursor	lipoamide dehydrogenase 2 (mtLPD2); FUNCTIONS IN: dihydrolipoyl dehydrogenase activity, copper ion binding, cobalt ion binding, zinc ion binding, ATP binding; INVOLVED IN: response to cadmium ion; LOCATED IN: mitochondrion, chloroplast, mitochondrial respiratory chain complex I, mitochondrial matrix; EXPRESSED IN: 28 plant structures; EXPRESSED DURING: 17 growth stages; CONTAINS InterPro DOMAIN/s…	protein_coding
RCC	Bn-A08-p11452221		A08	9295219	BnaA08g09610	A08	138.35	9156869	AT4G21680	NITRATE TRANSPORTER 1.8	Encodes a nitrate transporter (NRT1.8). Functions in nitrate removal from the xylem sap. Mediates cadmium tolerance.	NITRATE TRANSPORTER 1.8 (NRT1.8); FUNCTIONS IN: transporter activity, nitrate transmembrane transporter activity; INVOLVED IN: response to cadmium ion, oligopeptide transport, response to nitrate; LOCATED IN: plasma membrane, membrane; EXPRESSED IN: 9 plant structures; EXPRESSED DURING: LP.04 four leaves visible, 4 anthesis, petal differentiation and expansion stage; CONTAINS InterPro DOMAIN/s: O…	protein_coding
RCC	Bn-scaff_15918_1-p318193		C02	42242763	BnaC02g39220	C02	28.957	42213806	AT5G63950	chromatin remodeling 24		chromatin remodeling 24 (CHR24); FUNCTIONS IN: helicase activity, DNA binding, nucleic acid binding, ATP binding; INVOLVED IN: response to cadmium ion; EXPRESSED IN: 22 plant structures; EXPRESSED DURING: 7 growth stages; CONTAINS InterPro DOMAIN/s: DEAD-like helicase, N-terminal (InterPro:IPR014001), DNA/RNA helicase, C-terminal (InterPro:IPR001650), Helicase, superfamily 1/2, ATP-binding domain…	protein_coding
RCC	Bn-scaff_26086_1-p11779		C02	44930131	BnaC02g42190	C02	28.464	44901667	AT4G25100	Fe superoxide dismutase 1	Fe-superoxide dismutase	Fe superoxide dismutase 1 (FSD1); FUNCTIONS IN: superoxide dismutase activity, copper ion binding; INVOLVED IN: response to oxidative stress, response to cadmium ion, removal of superoxide radicals, response to copper ion, circadian rhythm; LOCATED IN: in 6 components; EXPRESSED IN: 22 plant structures; EXPRESSED DURING: 14 growth stages; CONTAINS InterPro DOMAIN/s: Manganese/iron superoxide dism…	protein_coding
RCC	Bn-scaff_26086_1-p11779		C02	44930131	BnaC02g42560	C02	210.535	45140666	AT5G63530	farnesylated protein 3	Farnesylated protein that binds metals.	farnesylated protein 3 (FP3); FUNCTIONS IN: transition metal ion binding, metal ion binding; INVOLVED IN: cellular transition metal ion homeostasis; LOCATED IN: plasma membrane; EXPRESSED IN: 22 plant structures; EXPRESSED DURING: 13 growth stages; CONTAINS InterPro DOMAIN/s: Heavy metal transport/detoxification protein (InterPro:IPR006121); BEST Arabidopsis thaliana protein match is: Heavy metal…	protein_coding
RCC	Bn-scaff_21386_1-p17474		C03	52791503	BnaC03g63350	C03	5.892	52797395	AT4G19880	Glutathione S-transferase family protein		Glutathione S-transferase family protein; FUNCTIONS IN: molecular_function unknown; INVOLVED IN: response to cadmium ion; LOCATED IN: chloroplast; EXPRESSED IN: 23 plant structures; EXPRESSED DURING: 13 growth stages; CONTAINS InterPro DOMAIN/s: Glutathione S-transferase, predicted (InterPro:IPR016639), Glutathione S-transferase, C-terminal (InterPro:IPR004046), Glutathione S-transferase, C-termi…	protein_coding
RCC	Bn-scaff_26642_1-p55725		C03	52942163	BnaC03g63500	C03	0.33	52942493	AT4G19690	iron-regulated transporter 1	The gene encodes Fe2+ transporter protein. It is a member of the Zrt/Irt-like protein (ZIP) family of transporters. AtIRT1 has broad specificity for divalent heavy metals, mediating the transport of zinc, manganese, cobalt and cadmium under Fe-deficient conditions. IRT1 is monoubiquitinated to promote endocytic trafficking.	iron-regulated transporter 1 (IRT1); FUNCTIONS IN: manganese ion transmembrane transporter activity, zinc ion transmembrane transporter activity, cadmium ion transmembrane transporter activity, copper uptake transmembrane transporter activity, iron ion transmembrane transporter activity; INVOLVED IN: in 11 processes; LOCATED IN: endomembrane system, membrane; EXPRESSED IN: 9 plant structures; EXP…	protein_coding
RCC	Bn-scaff_17042_1-p511184		C03	53628383	BnaC03g64020	C03	127.384	53500999	AT4G21680	NITRATE TRANSPORTER 1.8	Encodes a nitrate transporter (NRT1.8). Functions in nitrate removal from the xylem sap. Mediates cadmium tolerance.	NITRATE TRANSPORTER 1.8 (NRT1.8); FUNCTIONS IN: transporter activity, nitrate transmembrane transporter activity; INVOLVED IN: response to cadmium ion, oligopeptide transport, response to nitrate; LOCATED IN: plasma membrane, membrane; EXPRESSED IN: 9 plant structures; EXPRESSED DURING: LP.04 four leaves visible, 4 anthesis, petal differentiation and expansion stage; CONTAINS InterPro DOMAIN/s: O…	protein_coding
RCC	Bn-scaff_17457_1-p82664		C03	54463423	BnaC03g65260	C03	496.757	54960180	AT1G02920	glutathione S-transferase 7	Encodes glutathione transferase belonging to the phi class of GSTs. Naming convention according to Wagner et al. (2002).	glutathione S-transferase 7 (GSTF7); FUNCTIONS IN: glutathione transferase activity, copper ion binding, cobalt ion binding, glutathione binding; INVOLVED IN: defense response to fungus, incompatible interaction, response to cadmium ion, response to salt stress, defense response to bacterium, toxin catabolic process; LOCATED IN: nucleus, vacuole, cytoplasm; EXPRESSED IN: root, cultured cell, leaf…	protein_coding
RCC	Bn-scaff_16888_1-p1816216		C04	45949946	BnaC04g47210	C04	351.374	46301320	AT3G14930	Uroporphyrinogen decarboxylase		HEME1; FUNCTIONS IN: uroporphyrinogen decarboxylase activity; INVOLVED IN: response to cadmium ion; LOCATED IN: chloroplast stroma, chloroplast; EXPRESSED IN: 23 plant structures; EXPRESSED DURING: 14 growth stages; CONTAINS InterPro DOMAIN/s: Uroporphyrinogen decarboxylase HemE (InterPro:IPR006361), Uroporphyrinogen decarboxylase (URO-D) (InterPro:IPR000257); BEST Arabidopsis thaliana protein ma…	protein_coding
RCC	Bn-scaff_16069_1-p3375579		C07	39782757	BnaC07g39340	C07	483.801	40266558	AT4G25100	Fe superoxide dismutase 1	Fe-superoxide dismutase	Fe superoxide dismutase 1 (FSD1); FUNCTIONS IN: superoxide dismutase activity, copper ion binding; INVOLVED IN: response to oxidative stress, response to cadmium ion, removal of superoxide radicals, response to copper ion, circadian rhythm; LOCATED IN: in 6 components; EXPRESSED IN: 22 plant structures; EXPRESSED DURING: 14 growth stages; CONTAINS InterPro DOMAIN/s: Manganese/iron superoxide dism…	protein_coding
RCC	Bn-scaff_16110_1-p685258		C07	44204542	BnaC07g46800	C07	95.04	44299582	AT4G37870	phosphoenolpyruvate carboxykinase 1	Encodes a phosphoenolpyruvate carboxykinase that localizes to the cytosol.	phosphoenolpyruvate carboxykinase 1 (PCK1); FUNCTIONS IN: phosphoenolpyruvate carboxykinase activity, purine nucleotide binding, phosphoenolpyruvate carboxykinase (ATP) activity, ATP binding; INVOLVED IN: defense response to fungus, incompatible interaction, response to cadmium ion, cellular response to phosphate starvation, gluconeogenesis; LOCATED IN: cytosol, nucleolus, nucleus, membrane; EXPR…	protein_coding
RCC	Bn-scaff_17190_1-p9206		C09	3592360	BnaC09g04910	C09	31.131	2846557	AT4G25100	Fe superoxide dismutase 1	Fe-superoxide dismutase	Fe superoxide dismutase 1 (FSD1); FUNCTIONS IN: superoxide dismutase activity, copper ion binding; INVOLVED IN: response to oxidative stress, response to cadmium ion, removal of superoxide radicals, response to copper ion, circadian rhythm; LOCATED IN: in 6 components; EXPRESSED IN: 22 plant structures; EXPRESSED DURING: 14 growth stages; CONTAINS InterPro DOMAIN/s: Manganese/iron superoxide dism…	protein_coding
CT	Bn-A03-p28233201		A03	26699546	BnaA03g50720	A03	362.468	26337078	AT3G48000	aldehyde dehydrogenase 2B4	Encodes a putative (NAD+) aldehyde dehydrogenase.	aldehyde dehydrogenase 2B4 (ALDH2B4); FUNCTIONS IN: 3-chloroallyl aldehyde dehydrogenase activity, aldehyde dehydrogenase (NAD) activity, ATP binding; INVOLVED IN: response to cadmium ion; LOCATED IN: mitochondrion, chloroplast; EXPRESSED IN: 24 plant structures; EXPRESSED DURING: 14 growth stages; CONTAINS InterPro DOMAIN/s: Aldehyde/histidinol dehydrogenase (InterPro:IPR016161), Aldehyde dehydr…	protein_coding
CT	Bn-A03-p28233201		A03	26699546	BnaA03g51760	A03	296.53	26403016	AT4G11600	glutathione peroxidase 6	Encodes glutathione peroxidase.	glutathione peroxidase 6 (GPX6); FUNCTIONS IN: glutathione peroxidase activity; INVOLVED IN: response to oxidative stress, response to cadmium ion, response to salt stress, response to metal ion; LOCATED IN: cytosol, mitochondrion, chloroplast, plasma membrane; EXPRESSED IN: 26 plant structures; EXPRESSED DURING: 14 growth stages; CONTAINS InterPro DOMAIN/s: Thioredoxin fold (InterPro:IPR012335),…	protein_coding
CT	Bn-A03-p28233701		A03	26700046	BnaA03g51850	A03	291.51	26991556	AT2G30970	aspartate aminotransferase 1	ASPARTATE AMINOTRANSFERASE 1	aspartate aminotransferase 1 (ASP1); FUNCTIONS IN: L-aspartate:2-oxoglutarate aminotransferase activity, copper ion binding; INVOLVED IN: response to cadmium ion; LOCATED IN: mitochondrion; EXPRESSED IN: 25 plant structures; EXPRESSED DURING: 13 growth stages; CONTAINS InterPro DOMAIN/s: Aminotransferase, class I/classII (InterPro:IPR004839), Pyridoxal phosphate-dependent transferase, major domai…	protein_coding
CT	Bn-A05-p21037865		A05	19196309	BnaA05g27270	A05	497.976	19694285	AT3G11830	TCP-1/cpn60 chaperonin family protein		TCP-1/cpn60 chaperonin family protein; FUNCTIONS IN: unfolded protein binding, ATP binding; INVOLVED IN: response to cadmium ion; LOCATED IN: cellular_component unknown; EXPRESSED IN: 25 plant structures; EXPRESSED DURING: 14 growth stages; CONTAINS InterPro DOMAIN/s: Chaperonin Cpn60/TCP-1 (InterPro:IPR002423), Chaperone, tailless complex polypeptide 1 (InterPro:IPR017998), T-complex protein 1, …	protein_coding
CT	Bn-A09-p17415894		A09	13189315	BnaA09g20300	A09	24.013	13213328	AT4G04740	calcium-dependent protein kinase 23	member of Calcium Dependent Protein Kinase	calcium-dependent protein kinase 23 (CPK23); FUNCTIONS IN: in 6 functions; INVOLVED IN: response to cadmium ion, protein amino acid phosphorylation, N-terminal protein myristoylation; EXPRESSED IN: 18 plant structures; EXPRESSED DURING: 9 growth stages; CONTAINS InterPro DOMAIN/s: EF-Hand 1, calcium-binding site (InterPro:IPR018247), Serine/threonine-protein kinase domain (InterPro:IPR002290), EF…	protein_coding
CT	Bn-A09-p25633407		A09	23746951	BnaA09g31000	A09	129.47	23058953	AT1G23490	ADP-ribosylation factor 1	Gene encoding ADP-ribosylation factor and similar to other ARFs and ARF-like proteins. A member of ARF GTPase family. Arabidopsis has 21 known members, known to be essential for vesicle coating and uncoating and functions in GTP-binding. The gene is shown to play a role in cell division, cell expansion and cellulose production using antisense construct.	ADP-ribosylation factor 1 (ARF1); FUNCTIONS IN: protein binding, phospholipase activator activity, GTP binding; INVOLVED IN: response to cadmium ion, N-terminal protein myristoylation; LOCATED IN: intracellular; EXPRESSED IN: 24 plant structures; EXPRESSED DURING: 16 growth stages; CONTAINS InterPro DOMAIN/s: ADP-ribosylation factor (InterPro:IPR006688), Small GTP-binding protein (InterPro:IPR005…	protein_coding
CT	Bn-A09-p25633407		A09	23746951	BnaA09g32780	A09	476.715	24223666	AT2G35840	Sucrose-6F-phosphate phosphohydrolase family protein		Sucrose-6F-phosphate phosphohydrolase family protein; FUNCTIONS IN: phosphatase activity, magnesium ion binding, sucrose-phosphatase activity, catalytic activity; INVOLVED IN: response to cadmium ion, sucrose biosynthetic process; LOCATED IN: nucleus, cytoplasm; EXPRESSED IN: 25 plant structures; EXPRESSED DURING: 13 growth stages; CONTAINS InterPro DOMAIN/s: Sucrose-phosphate synthase (InterPro:…	protein_coding
CT	Bn-scaff_20270_1-p1323200		C05	41750625	BnaC05g46100	C05	3.649	41746976	AT4G04740	calcium-dependent protein kinase 23	member of Calcium Dependent Protein Kinase	calcium-dependent protein kinase 23 (CPK23); FUNCTIONS IN: in 6 functions; INVOLVED IN: response to cadmium ion, protein amino acid phosphorylation, N-terminal protein myristoylation; EXPRESSED IN: 18 plant structures; EXPRESSED DURING: 9 growth stages; CONTAINS InterPro DOMAIN/s: EF-Hand 1, calcium-binding site (InterPro:IPR018247), Serine/threonine-protein kinase domain (InterPro:IPR002290), EF…	protein_coding
CT	Bn-scaff_28429_1-p1030124		C05	42284306	BnaC05g47450	C05	133.007	42417313	AT1G13440	glyceraldehyde-3-phosphate dehydrogenase C2		glyceraldehyde-3-phosphate dehydrogenase C2 (GAPC2); FUNCTIONS IN: copper ion binding, glyceraldehyde-3-phosphate dehydrogenase activity, zinc ion binding; INVOLVED IN: response to oxidative stress, response to cadmium ion, gluconeogenesis, defense response to bacterium, glycolysis; LOCATED IN: in 8 components; EXPRESSED IN: 27 plant structures; EXPRESSED DURING: 15 growth stages; CONTAINS InterP…	protein_coding
CT	Bn-scaff_28429_1-p1030124		C05	42284306	BnaC05g47630	C05	286.356	42570662	AT5G18170	glutamate dehydrogenase 1	Encodes the 43 kDa alpha-subunit of the glutamate dehydrogenase with a putative mitochondrial transit polypeptide and NAD(H)- and alpha-ketoglutarate-binding domains. Mitochondrial localization confirmed by subcellular fractionation. Combines in several ratios with GDH2 protein (GDH-beta) to form seven isoenzymes. Catalyzes the cleavage of glycine residues. May be involved in ammonia assimilation…	glutamate dehydrogenase 1 (GDH1); FUNCTIONS IN: in 6 functions; INVOLVED IN: response to cadmium ion, response to salt stress, nitrogen compound metabolic process, response to absence of light; LOCATED IN: mitochondrion; EXPRESSED IN: 25 plant structures; EXPRESSED DURING: 13 growth stages; CONTAINS InterPro DOMAIN/s: Glutamate/phenylalanine/leucine/valine dehydrogenase (InterPro:IPR006095), Glut…	protein_coding
CT	Bn-scaff_16445_1-p2613244		C08	34299918	BnaC08g37910	C08	161.578	34461496	AT1G78380	glutathione S-transferase TAU 19	Encodes a glutathione transferase that is a member of Tau GST gene family. Expression is induced by drought stress, oxidative stress, and high doses of auxin and cytokinin. naming convention according to Wagner et al. (2002) The expression of this gene is upregulated by herbicide safeners such as benoxacor and fenclorim.	glutathione S-transferase TAU 19 (GSTU19); FUNCTIONS IN: glutathione transferase activity, glutathione binding; INVOLVED IN: response to oxidative stress, response to cadmium ion, response to cyclopentenone, toxin catabolic process, cellular response to water deprivation; LOCATED IN: chloroplast, plasma membrane, chloroplast stroma, cytoplasm; EXPRESSED IN: 26 plant structures; EXPRESSED DURING: …	protein_coding
CT	Bn-scaff_16445_1-p2613244		C08	34299918	BnaC08g38130	C08	282.997	34582915	AT1G78870	ubiquitin-conjugating enzyme 35	UBC35/UBC13A encodes a protein that may play a role in DNA damage responses and error-free post-replicative DNA repair by participating in lysine-63-based polyubiquitination reactions. UBC35/UBC13A can form diubiquitin and triubiquitin chains in combination with MMZ1,2,3,4/(UEV1A,B,C,D) in vitro. It can also functionally complement an mms2 ubc13 mutation in budding yeast by increasing the double …	ubiquitin-conjugating enzyme 35 (UBC35); FUNCTIONS IN: ubiquitin-protein ligase activity, protein binding; INVOLVED IN: root epidermal cell differentiation, response to cadmium ion, postreplication repair, response to iron ion, ubiquitin-dependent protein catabolic process; LOCATED IN: UBC13-MMS2 complex; EXPRESSED IN: male gametophyte, cultured cell, pollen tube; EXPRESSED DURING: L mature polle…	protein_coding
CT	Bn-scaff_16445_1-p2613244		C08	34299918	BnaC08g38580	C08	476.38	34776298	AT1G15960	NRAMP metal ion transporter 6	member of Nramp2 family	NRAMP metal ion transporter 6 (NRAMP6); FUNCTIONS IN: inorganic anion transmembrane transporter activity, metal ion transmembrane transporter activity; INVOLVED IN: cellular metal ion homeostasis, metal ion transport; LOCATED IN: membrane; EXPRESSED IN: 12 plant structures; EXPRESSED DURING: LP.06 six leaves visible, LP.04 four leaves visible, 4 anthesis, petal differentiation and expansion stage…	protein_coding
CT	Bn-scaff_16445_1-p728936		C08	36063579	BnaC08g40330	C08	467.699	35595880	AT1G13440	glyceraldehyde-3-phosphate dehydrogenase C2		glyceraldehyde-3-phosphate dehydrogenase C2 (GAPC2); FUNCTIONS IN: copper ion binding, glyceraldehyde-3-phosphate dehydrogenase activity, zinc ion binding; INVOLVED IN: response to oxidative stress, response to cadmium ion, gluconeogenesis, defense response to bacterium, glycolysis; LOCATED IN: in 8 components; EXPRESSED IN: 27 plant structures; EXPRESSED DURING: 15 growth stages; CONTAINS InterP…	protein_coding
CT	Bn-scaff_16445_1-p268218		C08	36557402	BnaC08g42630	C08	175.443	36732845	AT1G57720	Translation elongation factor EF1B, gamma chain		Translation elongation factor EF1B, gamma chain; FUNCTIONS IN: copper ion binding, translation elongation factor activity; INVOLVED IN: response to cadmium ion, response to zinc ion; LOCATED IN: cell wall, plasma membrane, vacuole, membrane; EXPRESSED IN: 6 plant structures; EXPRESSED DURING: seedling growth, seed development stages; CONTAINS InterPro DOMAIN/s: Thioredoxin fold (InterPro:IPR01233…	protein_coding
CT	Bn-scaff_16445_1-p268218		C08	36557402	BnaC08g42820	C08	290.871	36848273	AT5G42020	Heat shock protein 70 (Hsp 70) family protein	Luminal binding protein (BiP2) involved in polar nuclei fusion during proliferation of endosperm nuclei.	BIP2; FUNCTIONS IN: ATP binding; INVOLVED IN: protein folding, response to cadmium ion, response to heat, polar nucleus fusion, response to endoplasmic reticulum stress; LOCATED IN: in 8 components; EXPRESSED IN: 8 plant structures; EXPRESSED DURING: seedling growth, seed development stages; CONTAINS InterPro DOMAIN/s: Heat shock protein 70, conserved site (InterPro:IPR018181), Heat shock protein…	protein_coding
CT	Bn-scaff_21269_1-p313587		C08	37159545	BnaC08g43630	C08	81.081	37240626	AT1G03980	phytochelatin synthase 2	Encodes a protein with phytochelatin synthase activity which binds Cd2+ and Cd-glutathione complexes with high affinity. The protein has been postulated to be involved in Cd2+ tolerance. AtPCS2 expression appears to be less than that of AtPCS1, explaining the inability of endogenous AtPCS2 to substitute for AtPCS1 in the cad1-3 mutant (AtPCS1 null).	phytochelatin synthase 2 (PCS2); CONTAINS InterPro DOMAIN/s: Phytochelatin synthase, C-terminal (InterPro:IPR015407), Phytochelatin synthase (InterPro:IPR007719); BEST Arabidopsis thaliana protein match is: phytochelatin synthase 1 (PCS1) (TAIR:AT5G44070.1); Has 342 Blast hits to 342 proteins in 145 species: Archae - 0; Bacteria - 138; Metazoa - 36; Fungi - 7; Plants - 117; Viruses - 0; Other Euk…	protein_coding
CT	Bn-scaff_21269_1-p313587		C08	37159545	BnaC08g43630	C08	81.081	37240626	AT5G44070	phytochelatin synthase 1 (PCS1)	Phytochelatin synthase gene confers tolerance to cadmium ions. Catalyzes phytochelatin (PC) synthesis from glutathione (GSH) in the presence of Cd2+, Zn2+, Cu2+ and Fe3+, but not by Co2+ or Ni2+.	CADMIUM SENSITIVE 1 (CAD1); FUNCTIONS IN: cadmium ion binding, copper ion binding, glutathione gamma-glutamylcysteinyltransferase activity; INVOLVED IN: in 6 processes; LOCATED IN: cytosol; EXPRESSED IN: 24 plant structures; EXPRESSED DURING: 13 growth stages; CONTAINS InterPro DOMAIN/s: Phytochelatin synthase, C-terminal (InterPro:IPR015407), Phytochelatin synthase (InterPro:IPR007719); BEST Ara…	protein_coding
CT
Trait: RCC, root Cd concentration; SCC, shoot Cd concentration; CT, Cd translocation coefficient.
